# Supplementary material for: Preserving fairness and diagnostic accuracy in private large-scale AI models for medical imaging
Source: PubMed Central journal article supplement (PMC10940659; doi:10.1038/s43856-024-00462-6), 2024-03-14
Supplement: 43856_2024_462_MOESM3_ESM.pdf [file 43856_2024_462_MOESM3_ESM.pdf]

1 **Description of Additional Supplementary Files**

2

3 **File Name:** Supplementary Data 1

4 **Description:** Source data
